# Supplementary material for: Pulse Pressure and the Risk of End‐Stage Renal Disease Among Chinese Adults in Singapore: The Singapore Chinese Health Study
Source: PubMed Central journal article supplement — J Am Heart Assoc. 2019 Nov 26;8(23):e013282. doi: 10.1161/JAHA.119.013282 (PMC6912960; doi:10.1161/jaha.119.013282), 2019-11-26
Supplement: JAH3-8-e013282-s001.pdf [file JAH3-8-e013282-s001.pdf]

# **SUPPLEMENTAL MATERIAL**

**Table S1. Baseline characteristics of participants in the Singapore Chinese Health Study.**

| <b>Characteristic</b>                             | <b>Values</b>    |
|---------------------------------------------------|------------------|
| N                                                 | 30,517           |
| Deaths unrelated to ESRD, n (%)                   | 7,731 (25.3)     |
| SBP (mmHg), mean $\pm$ SD                         | 136.7 $\pm$ 22.4 |
| DBP (mmHg), mean $\pm$ SD                         | 80.3 $\pm$ 11.1  |
| PP (mmHg), mean $\pm$ SD                          | 56.4 $\pm$ 16.5  |
| MAP (mmHg), mean $\pm$ SD                         | 99.1 $\pm$ 13.7  |
| Age (y), mean $\pm$ SD                            | 63.0 $\pm$ 7.8   |
| Men, n (%)                                        | 13,504 (44.3)    |
| Cantonese, n (%)                                  | 15,393 (50.4)    |
| Secondary school or higher education level, n (%) | 9,874 (32.4)     |
| BMI (kg/m <sup>2</sup> ), mean $\pm$ SD           | 23.2 $\pm$ 3.5   |
| Ever smokers, n (%)                               | 9,770 (32.0)     |
| Daily alcohol drinkers, n (%)                     | 887 (2.9)        |
| Coffee consumption, n (%)                         |                  |
| 0 to <1 cup/day                                   | 9,230 (30.3)     |
| 1 cup/day                                         | 10,880 (35.7)    |
| $\geq$ 2 cups/day                                 | 10,407 (34.1)    |
| Sleep, n (%)                                      |                  |
| <5 hours/day                                      | 2,943 (9.6)      |
| 6-8 hours/day                                     | 25,620 (84.0)    |
| $\geq$ 9 hours/day                                | 1,954 (6.4)      |
| Total protein intake*, mean $\pm$ SD              | 59.4 $\pm$ 10.0  |
| Red meat intake*, mean $\pm$ SD                   | 30.3 $\pm$ 18.8  |
| Current daily incense users, n (%)                | 22,826 (74.8)    |
| Physical activity <sup>†</sup> , n (%)            | 10,763 (35.3)    |
| History of diabetes, n (%)                        | 4,434 (14.5)     |
| History of cardiovascular disease, n (%)          | 3,287 (10.8)     |
| Antihypertensive medication use, n (%)            | 10,911 (35.8)    |

\* Red meat and total protein were reported as gram/day.

<sup>†</sup> Physical activity defined as at least 0.5h/week of moderate activity, vigorous activity or strenuous sports.

**Table S2. Pearson correlation coefficients between blood pressure indices in the Singapore Chinese Health Study.\***

|     | SBP  | DBP  | PP   | MAP |
|-----|------|------|------|-----|
| SBP | -    | -    | -    | -   |
| DBP | 0.66 | -    | -    | -   |
| PP  | 0.84 | 0.28 | -    | -   |
| MAP | 0.88 | 0.86 | 0.60 | -   |

\* All *P* values for correlation <0.001.
